# Supplementary material
Source: PubMed Central journal article supplement (PMC6684394)
Supplement: NIHMS1532641-supplement-1.pdf [file NIHMS1532641-supplement-1.pdf]

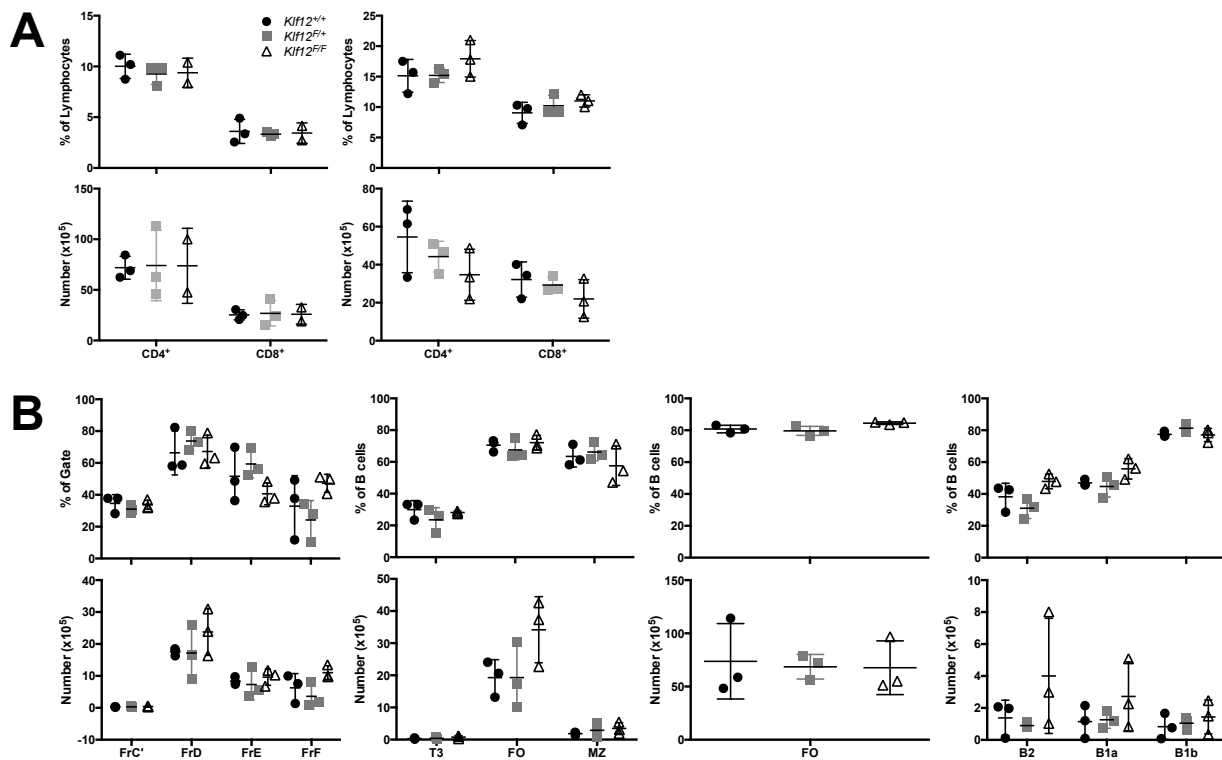

**FIGURE 1.** T and B cell development is normal in  $Klf12$ -deficient mice. **(A)** Percentages and total cell numbers of  $CD4^+$  and  $CD8^+$  T cells in the thymus (*left panels*) and in the spleen (*right panels*). **(B)** Percentages and total cell numbers of developmental B cell subsets in the BM (*left panels*), spleen (*second left panels*), lymph node (*second right panels*), and peritoneal cavity (*right panels*). Subsets in the BM are defined as FrC' pro-B cells:  $CD19^+IgM^-B220^+CD43^+CD24^+$ ; FrD pre-B cells:  $CD19^+IgM^-B220^+CD43^-$ ; FrE immature B cells:  $CD19^+IgM^+B220^+AA4.1^+CD24^{hi}$ ; and FrF mature B cells:  $CD19^+IgM^+B220^+AA4.1^-CD24^+$ . Subsets in the spleen are defined as T3 (transitional stage 3) B cells:  $IgM^+IgD^+CD19^+B220^+AA4.1^+CD23^+$ ; FO (follicular) B cells:  $IgM^+IgD^+CD19^+B220^+AA4.1^-CD23^+$ ; and MZ (marginal zone) B cells:  $IgM^+IgD^+CD19^+B220^+AA4.1^-CD23^-$ . Subsets in the lymph node are defined as FO (follicular) B cells:  $IgM^+IgD^+CD19^+B220^+AA4.1^-CD23^+CD21^+CD43^-$ . Subsets in the peritoneal cavity are defined as B2 follicular B cells:  $IgM^+IgD^+CD19^+CD43^-CD23^+CD5^-$ ; B1a B cells:  $IgM^+IgD^+CD19^+CD43^-B220^+CD5^+$ ; and B1b B cells:  $IgM^+IgD^+CD19^+CD43^+B220^+CD5^-CD11b^+$ . Data are representative of 4 experiments ( $n = 3$  mice/genotype/experiment).

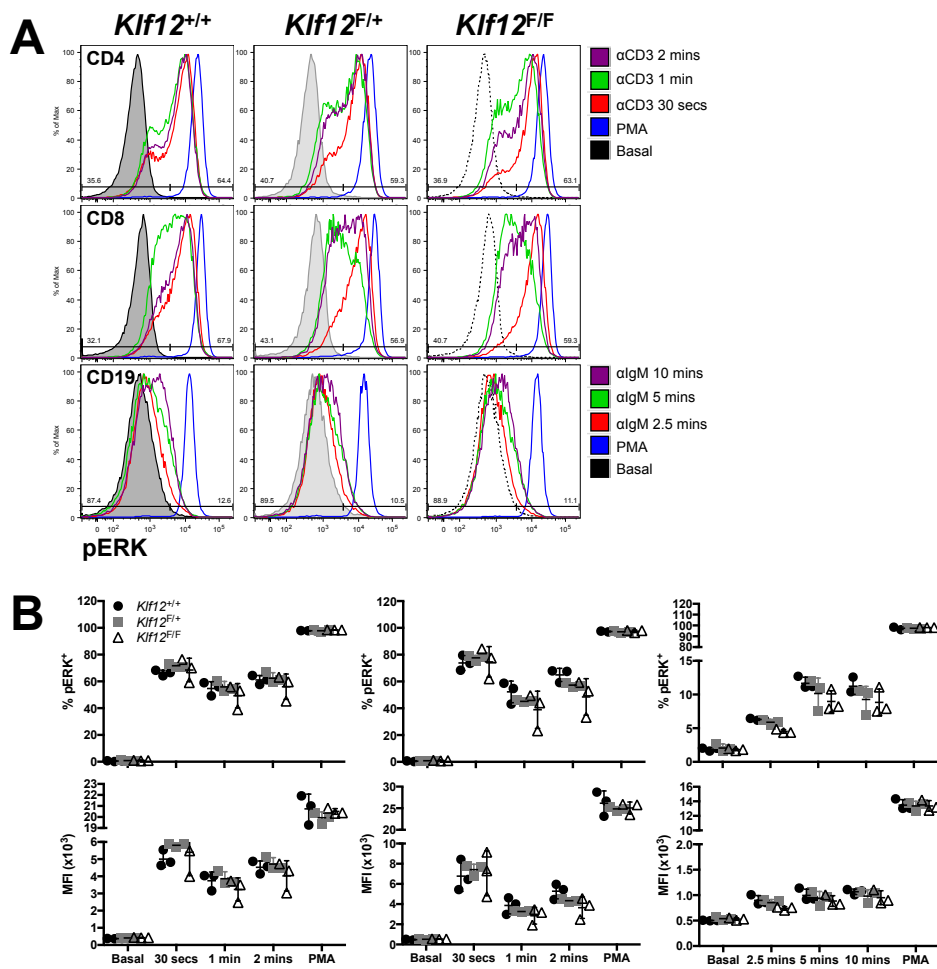

**FIGURE 2.** Upregulation of pERK is normal in *Klf12*-deficient T and B cells. **(A)** Representative histograms of pERK upregulation in lymph node CD4<sup>+</sup>, CD8<sup>+</sup> T cells, and CD19<sup>+</sup> B cells from *Klf12*<sup>+/+</sup>, *Klf12*<sup>F/+</sup>, and *Klf12*<sup>F/F</sup> mice stimulated with anti-CD3 or anti-IgM. **(B)** Percentage and MFI of pERK in CD4<sup>+</sup> T cells (*left panels*), CD8<sup>+</sup> T cells (*middle panels*), and CD19<sup>+</sup> T cells (*right panels*). Data are representative of 4 experiments ( $n = 2-3$  mice/genotype/experiment).

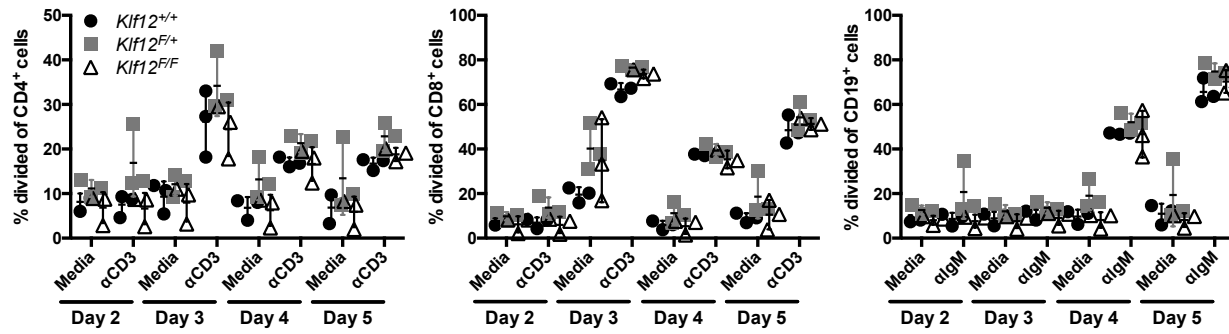

**FIGURE 3.** T and B cell proliferation is normal in *Klf12*-deficient mice. Proliferation of *Klf12*<sup>+/+</sup>, *Klf12*<sup>F/+</sup>, and *Klf12*<sup>F/F</sup> lymph node CD4<sup>+</sup> T cells (*left panels*), CD8<sup>+</sup> T cells (*middle panels*), and CD19<sup>+</sup> T cells (*right panels*) after *in vitro* stimulation for 2-5 days with anti-CD3 and anti-IgM. Data are representative of 4 experiments ( $n = 2-3$  mice/genotype/experiment).

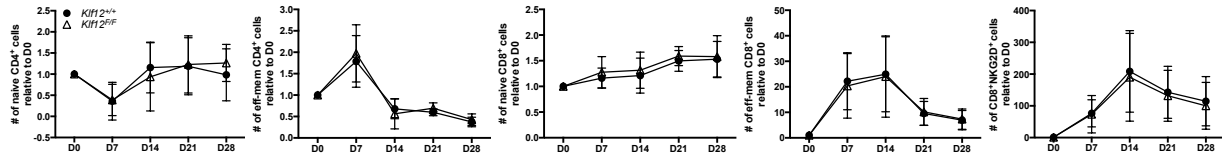

**FIGURE 4.** Normal numbers of *Klf12*-deficient T cells from MCMV-infected BM chimeric mice. Relative numbers of naïve ( $CD44^{lo}CD62L^{+}$ )  $CD4^{+}$  T cells, effector-memory ( $CD44^{hi}CD62L^{-}$ )  $CD4^{+}$  T cells, naïve ( $CD44^{-}CD62L^{+}$ )  $CD8^{+}$  T cells, effector-memory ( $CD44^{+}CD62L^{lo/+}$ )  $CD8^{+}$  cells, and MCMV-specific  $NKG2D^{+}CD8^{+}$  T cells in the blood following MCMV infection. Data are representative of 4 experiments ( $n = 3-6$  mice/experiment).
